# Supplementary material for: Mechanical thrombectomy is cost-effective versus medical management alone around Europe in patients with low ASPECTS
Source: PubMed Central journal article supplement — J Neurointerv Surg. 2022 Dec 23;15(7):629–33. doi: 10.1136/jnis-2022-019849 (PMC10313965; doi:10.1136/jnis-2022-019849), 2022-12-23
Supplement: jnis-2022-019849supp001.pdf [file jnis-2022-019849supp001.pdf]

## Supplementary materials

Table S1. Clinical inputs

| Parameter | Value Used |
|-----------|------------|
| MT group  |            |
| mRS 0     | 2%         |
| mRS 1     | 3%         |
| mRS 2     | 9%         |
| mRS 3     | 17%        |
| mRS 4     | 33%        |
| mRS 5     | 18%        |
| mRS 6     | 18%        |
| MM group  |            |
| mRS 0     | 0%         |
| mRS 1     | 2,9%       |
| mRS 2     | 4,9%       |
| mRS 3     | 4,9%       |
| mRS 4     | 24,5%      |
| mRS 5     | 39,3%      |
| mRS 6     | 23,5%      |

Source: RESCUE study Haga clic o pulse aquí para escribir texto.

Table S2. Cost inputs

| Parameter                    | Value Used   | Distribution | Source            |
|------------------------------|--------------|--------------|-------------------|
| Belgium                      |              |              |                   |
| Acute care cost MT+IVT mRS 0 | \$ 13 069,88 | Gamma        | Dewilde et al (1) |
| Acute care cost MT+IVT mRS 1 | \$ 17 303,42 | Gamma        | Dewilde et al     |
| Acute care cost MT+IVT mRS 2 | \$ 25 308,74 | Gamma        | Dewilde et al     |
| Acute care cost MT+IVT mRS 3 | \$ 40 716,65 | Gamma        | Dewilde et al     |
| Acute care cost MT+IVT mRS 4 | \$ 51 270,53 | Gamma        | Dewilde et al     |
| Acute care cost MT+IVT mRS 5 | \$ 41 715,65 | Gamma        | Dewilde et al     |
| Acute care cost MT+IVT mRS 6 | \$ 27 457,70 | Gamma        | Dewilde et al     |
| Acute care cost IVT mRS 0    | \$ 8 407,88  | Gamma        | Dewilde et al     |
| Acute care cost IVT mRS 1    | \$ 12 641,42 | Gamma        | Dewilde et al     |
| Acute care cost IVT mRS 2    | \$ 20 646,74 | Gamma        | Dewilde et al     |
| Acute care cost IVT mRS 3    | \$ 36 054,65 | Gamma        | Dewilde et al     |
| Acute care cost IVT mRS 4    | \$ 46 608,53 | Gamma        | Dewilde et al     |

|                                      |              |       |                    |
|--------------------------------------|--------------|-------|--------------------|
| Acute care cost IVT mRS 5            | \$ 37 053,65 | Gamma | Dewilde et al      |
| Acute care cost IVT mRS 6            | \$ 22 795,70 | Gamma | Dewilde et al      |
| Acute care cost mRS 3 without MT+IVT | \$ 35 536,65 | Gamma | Dewilde et al      |
| Acute care cost mRS 4 without MT+IVT | \$ 46 090,53 | Gamma | Dewilde et al      |
| Acute care cost mRS 5 without MT+IVT | \$ 36 535,65 | Gamma | Dewilde et al      |
| Acute care cost mRS 6 without MT+IVT | \$ 22 277,70 | Gamma | Dewilde et al      |
| Acute care cost mRS 3 without IVT    | \$ 35 536,65 | Gamma | Dewilde et al      |
| Acute care cost mRS 4 without IVT    | \$ 46 090,53 | Gamma | Dewilde et al      |
| Acute care cost mRS 5 without IVT    | \$ 36 535,65 | Gamma | Dewilde et al      |
| Acute care cost mRS 6 without IVT    | \$ 22 277,70 | Gamma | Dewilde et al      |
| Mid-term cost mRS 0                  | \$ 742,59    | Gamma | Dewilde et al      |
| Mid-term cost mRS 1                  | \$ 1 495,17  | Gamma | Dewilde et al      |
| Mid-term cost mRS 2                  | \$ 2 933,73  | Gamma | Dewilde et al      |
| Mid-term cost mRS 3                  | \$ 6 343,65  | Gamma | Dewilde et al      |
| Mid-term cost mRS 4                  | \$ 15 261,39 | Gamma | Dewilde et al      |
| Mid-term cost mRS 5                  | \$ 18 618,03 | Gamma | Dewilde et al      |
| Long-term cost mRS 0                 | \$ 810,58    | Gamma | Dewilde et al      |
| Long-term cost mRS 1                 | \$ 1 083,64  | Gamma | Dewilde et al      |
| Long-term cost mRS 2                 | \$ 1 804,03  | Gamma | Dewilde et al      |
| Long-term cost mRS 3                 | \$ 4 695,86  | Gamma | Dewilde et al      |
| Long-term cost mRS 4                 | \$ 11 747,96 | Gamma | Dewilde et al      |
| Long-term cost mRS 5                 | \$ 11 023,13 | Gamma | Dewilde et al      |
| France                               |              |       |                    |
| Acute care cost MT+IVT mRS 0         | \$ 18 520,68 | Gamma | Schimidt et al (2) |
| Acute care cost MT+IVT mRS 1         | \$ 18 520,68 | Gamma | Schimidt et al     |
| Acute care cost MT+IVT mRS 2         | \$ 18 520,68 | Gamma | Schimidt et al     |
| Acute care cost MT+IVT mRS 3         | \$ 22 105,74 | Gamma | Schimidt et al     |
| Acute care cost MT+IVT mRS 4         | \$ 22 105,74 | Gamma | Schimidt et al     |
| Acute care cost MT+IVT mRS 5         | \$ 22 312,05 | Gamma | Schimidt et al     |
| Acute care cost MT+IVT mRS 6         | \$ 24 202,38 | Gamma | Schimidt et al     |
| Acute care cost IVT mRS 0            | \$ 8 476,68  | Gamma | Schimidt et al     |
| Acute care cost IVT mRS 1            | \$ 8 476,68  | Gamma | Schimidt et al     |
| Acute care cost IVT mRS 2            | \$ 8 476,68  | Gamma | Schimidt et al     |
| Acute care cost IVT mRS 3            | \$ 12 061,74 | Gamma | Schimidt et al     |
| Acute care cost IVT mRS 4            | \$ 12 061,74 | Gamma | Schimidt et al     |
| Acute care cost IVT mRS 5            | \$ 12 268,05 | Gamma | Schimidt et al     |
| Acute care cost IVT mRS 6            | \$ 14 158,38 | Gamma | Schimidt et al     |
| Acute care cost mRS 3 without MT+IVT | \$ 11 162,74 | Gamma | Schimidt et al     |
| Acute care cost mRS 4 without MT+IVT | \$ 11 162,74 | Gamma | Schimidt et al     |
| Acute care cost mRS 5 without MT+IVT | \$ 11 369,05 | Gamma | Schimidt et al     |
| Acute care cost mRS 6 without MT+IVT | \$ 13 259,38 | Gamma | Schimidt et al     |
| Acute care cost mRS 3 without IVT    | \$ 11 162,74 | Gamma | Schimidt et al     |
| Acute care cost mRS 4 without IVT    | \$ 11 162,74 | Gamma | Schimidt et al     |
| Acute care cost mRS 5 without IVT    | \$ 11 369,05 | Gamma | Schimidt et al     |

|                                      |              |       |                      |
|--------------------------------------|--------------|-------|----------------------|
| Acute care cost mRS 6 without IVT    | \$ 13 259,38 | Gamma | Schimidt et al       |
| Mid-term cost mRS 0                  | \$ 909,11    | Gamma | Schimidt et al       |
| Mid-term cost mRS 1                  | \$ 227,28    | Gamma | Schimidt et al       |
| Mid-term cost mRS 2                  | \$ 227,28    | Gamma | Schimidt et al       |
| Mid-term cost mRS 3                  | \$ 11 579,04 | Gamma | Schimidt et al       |
| Mid-term cost mRS 4                  | \$ 22 518,12 | Gamma | Schimidt et al       |
| Mid-term cost mRS 5                  | \$ 22 437,03 | Gamma | Schimidt et al       |
| Long-term cost mRS 0                 | \$ 909,11    | Gamma | Schimidt et al       |
| Long-term cost mRS 1                 | \$ 909,11    | Gamma | Schimidt et al       |
| Long-term cost mRS 2                 | \$ 909,11    | Gamma | Schimidt et al       |
| Long-term cost mRS 3                 | \$ 11 579,04 | Gamma | Schimidt et al       |
| Long-term cost mRS 4                 | \$ 22 518,12 | Gamma | Schimidt et al       |
| Long-term cost mRS 5                 | \$ 22 437,03 | Gamma | Schimidt et al       |
| Germany                              |              |       |                      |
| Acute care cost MT+IVT mRS 0         | \$ 14 783,56 | Gamma | Muntendorf et al (3) |
| Acute care cost MT+IVT mRS 1         | \$ 14 783,56 | Gamma | Muntendorf et al     |
| Acute care cost MT+IVT mRS 2         | \$ 19 053,28 | Gamma | Muntendorf et al     |
| Acute care cost MT+IVT mRS 3         | \$ 22 293,58 | Gamma | Muntendorf et al     |
| Acute care cost MT+IVT mRS 4         | \$ 31 249,20 | Gamma | Muntendorf et al     |
| Acute care cost MT+IVT mRS 5         | \$ 32 183,46 | Gamma | Muntendorf et al     |
| Acute care cost MT+IVT mRS 6         | \$ 6 685,00  | Gamma | Muntendorf et al     |
| Acute care cost IVT mRS 0            | \$ 10 086,56 | Gamma | Muntendorf et al     |
| Acute care cost IVT mRS 1            | \$ 10 086,56 | Gamma | Muntendorf et al     |
| Acute care cost IVT mRS 2            | \$ 14 356,28 | Gamma | Muntendorf et al     |
| Acute care cost IVT mRS 3            | \$ 17 596,58 | Gamma | Muntendorf et al     |
| Acute care cost IVT mRS 4            | \$ 26 552,20 | Gamma | Muntendorf et al     |
| Acute care cost IVT mRS 5            | \$ 27 486,46 | Gamma | Muntendorf et al     |
| Acute care cost IVT mRS 6            | \$ 1 988,00  | Gamma | Muntendorf et al     |
| Acute care cost mRS 3 without MT+IVT | \$ 15 608,58 | Gamma | Muntendorf et al     |
| Acute care cost mRS 4 without MT+IVT | \$ 24 564,20 | Gamma | Muntendorf et al     |
| Acute care cost mRS 5 without MT+IVT | \$ 25 498,46 | Gamma | Muntendorf et al     |
| Acute care cost mRS 6 without MT+IVT | \$ -         | Gamma | Muntendorf et al     |
| Acute care cost mRS 3 without IVT    | \$ 15 608,58 | Gamma | Muntendorf et al     |
| Acute care cost mRS 4 without IVT    | \$ 24 564,20 | Gamma | Muntendorf et al     |
| Acute care cost mRS 5 without IVT    | \$ 25 498,46 | Gamma | Muntendorf et al     |
| Acute care cost mRS 6 without IVT    | \$ -         | Gamma | Muntendorf et al     |
| Mid-term cost mRS 0                  | \$ -         | Gamma | Muntendorf et al     |
| Mid-term cost mRS 1                  | \$ -         | Gamma | Muntendorf et al     |
| Mid-term cost mRS 2                  | \$ 4 269,72  | Gamma | Muntendorf et al     |
| Mid-term cost mRS 3                  | \$ 7 510,03  | Gamma | Muntendorf et al     |
| Mid-term cost mRS 4                  | \$ 16 465,64 | Gamma | Muntendorf et al     |
| Mid-term cost mRS 5                  | \$ 17 399,91 | Gamma | Muntendorf et al     |
| Long-term cost mRS 0                 | \$ -         | Gamma | Muntendorf et al     |
| Long-term cost mRS 1                 | \$ -         | Gamma | Muntendorf et al     |
| Long-term cost mRS 2                 | \$ 4 269,72  | Gamma | Muntendorf et al     |

|                                      |              |       |                    |
|--------------------------------------|--------------|-------|--------------------|
| Long-term cost mRS 3                 | \$ 7 510,03  | Gamma | Muntendorf et al   |
| Long-term cost mRS 4                 | \$ 16 465,64 | Gamma | Muntendorf et al   |
| Long-term cost mRS 5                 | \$ 17 399,91 | Gamma | Muntendorf et al   |
| Italy                                |              |       |                    |
| Acute care cost MT+IVT mRS 0         | \$ 10 954,00 | Gamma | Fattore et al (4)  |
| Acute care cost MT+IVT mRS 1         | \$ 10 954,00 | Gamma | Fattore et al      |
| Acute care cost MT+IVT mRS 2         | \$ 10 954,00 | Gamma | Fattore et al      |
| Acute care cost MT+IVT mRS 3         | \$ 11 857,00 | Gamma | Fattore et al      |
| Acute care cost MT+IVT mRS 4         | \$ 11 857,00 | Gamma | Fattore et al      |
| Acute care cost MT+IVT mRS 5         | \$ 12 553,00 | Gamma | Fattore et al      |
| Acute care cost MT+IVT mRS 6         | \$ 12 553,00 | Gamma | Fattore et al      |
| Acute care cost IVT mRS 0            | \$ 5 055,00  | Gamma | Fattore et al      |
| Acute care cost IVT mRS 1            | \$ 5 055,00  | Gamma | Fattore et al      |
| Acute care cost IVT mRS 2            | \$ 5 055,00  | Gamma | Fattore et al      |
| Acute care cost IVT mRS 3            | \$ 5 958,00  | Gamma | Fattore et al      |
| Acute care cost IVT mRS 4            | \$ 5 958,00  | Gamma | Fattore et al      |
| Acute care cost IVT mRS 5            | \$ 6 654,00  | Gamma | Fattore et al      |
| Acute care cost IVT mRS 6            | \$ 6 654,00  | Gamma | Fattore et al      |
| Acute care cost mRS 3 without MT+IVT | \$ 4 866,34  | Gamma | Fattore et al      |
| Acute care cost mRS 4 without MT+IVT | \$ 4 866,34  | Gamma | Fattore et al      |
| Acute care cost mRS 5 without MT+IVT | \$ 5 561,53  | Gamma | Fattore et al      |
| Acute care cost mRS 6 without MT+IVT | \$ 5 561,53  | Gamma | Fattore et al      |
| Acute care cost mRS 3 without IVT    | \$ 4 866,34  | Gamma | Fattore et al      |
| Acute care cost mRS 4 without IVT    | \$ 4 866,34  | Gamma | Fattore et al      |
| Acute care cost mRS 5 without IVT    | \$ 5 561,53  | Gamma | Fattore et al      |
| Acute care cost mRS 6 without IVT    | \$ 5 561,53  | Gamma | Fattore et al      |
| Mid-term cost mRS 0                  | \$ 683,03    | Gamma | Fattore et al      |
| Mid-term cost mRS 1                  | \$ 683,03    | Gamma | Fattore et al      |
| Mid-term cost mRS 2                  | \$ 683,03    | Gamma | Fattore et al      |
| Mid-term cost mRS 3                  | \$ 1 821,05  | Gamma | Fattore et al      |
| Mid-term cost mRS 4                  | \$ 1 821,05  | Gamma | Fattore et al      |
| Mid-term cost mRS 5                  | \$ 4 651,17  | Gamma | Fattore et al      |
| Long-term cost mRS 0                 | \$ 683,03    | Gamma | Fattore et al      |
| Long-term cost mRS 1                 | \$ 683,03    | Gamma | Fattore et al      |
| Long-term cost mRS 2                 | \$ 683,03    | Gamma | Fattore et al      |
| Long-term cost mRS 3                 | \$ 1 821,05  | Gamma | Fattore et al      |
| Long-term cost mRS 4                 | \$ 1 821,05  | Gamma | Fattore et al      |
| Long-term cost mRS 5                 | \$ 4 651,17  | Gamma | Fattore et al      |
| Sweden                               |              |       |                    |
| Acute care cost MT+IVT mRS 0         | \$ 22 841,43 | Gamma | Lekander et al (5) |
| Acute care cost MT+IVT mRS 1         | \$ 22 841,43 | Gamma | Lekander et al     |
| Acute care cost MT+IVT mRS 2         | \$ 22 841,43 | Gamma | Lekander et al     |
| Acute care cost MT+IVT mRS 3         | \$ 37 291,93 | Gamma | Lekander et al     |
| Acute care cost MT+IVT mRS 4         | \$ 47 666,72 | Gamma | Lekander et al     |
| Acute care cost MT+IVT mRS 5         | \$ 54 608,48 | Gamma | Lekander et al     |

|                                      |              |       |                             |
|--------------------------------------|--------------|-------|-----------------------------|
| Acute care cost MT+IVT mRS 6         | \$ 34 733,11 | Gamma | Lekander et al              |
| Acute care cost IVT mRS 0            | \$ 14 215,43 | Gamma | Lekander et al              |
| Acute care cost IVT mRS 1            | \$ 14 215,43 | Gamma | Lekander et al              |
| Acute care cost IVT mRS 2            | \$ 14 215,43 | Gamma | Lekander et al              |
| Acute care cost IVT mRS 3            | \$ 28 665,93 | Gamma | Lekander et al              |
| Acute care cost IVT mRS 4            | \$ 39 040,72 | Gamma | Lekander et al              |
| Acute care cost IVT mRS 5            | \$ 45 982,48 | Gamma | Lekander et al              |
| Acute care cost IVT mRS 6            | \$ 26 107,11 | Gamma | Lekander et al              |
| Acute care cost mRS 4 without MT+IVT | \$ 37 963,72 | Gamma | Lekander et al              |
| Acute care cost mRS 5 without MT+IVT | \$ 44 905,48 | Gamma | Lekander et al              |
| Acute care cost mRS 6 without MT+IVT | \$ 25 030,11 | Gamma | Lekander et al              |
| Acute care cost mRS 3 without IVT    | \$ 27 588,93 | Gamma | Lekander et al              |
| Acute care cost mRS 4 without IVT    | \$ 37 963,72 | Gamma | Lekander et al              |
| Acute care cost mRS 5 without IVT    | \$ 44 905,48 | Gamma | Lekander et al              |
| Acute care cost mRS 6 without IVT    | \$ 25 030,11 | Gamma | Lekander et al              |
| Mid-term cost mRS 0                  | \$ 1 739,89  | Gamma | Lekander et al              |
| Mid-term cost mRS 1                  | \$ 1 739,89  | Gamma | Lekander et al              |
| Mid-term cost mRS 2                  | \$ 1 739,89  | Gamma | Lekander et al              |
| Mid-term cost mRS 3                  | \$ 5 604,09  | Gamma | Lekander et al              |
| Mid-term cost mRS 4                  | \$ 10 912,45 | Gamma | Lekander et al              |
| Mid-term cost mRS 5                  | \$ 7 601,87  | Gamma | Lekander et al              |
| Long-term cost mRS 0                 | \$ 1 269,39  | Gamma | Lekander et al              |
| Long-term cost mRS 1                 | \$ 1 269,39  | Gamma | Lekander et al              |
| Long-term cost mRS 2                 | \$ 1 269,39  | Gamma | Lekander et al              |
| Long-term cost mRS 3                 | \$ 12 000,40 | Gamma | Lekander et al              |
| Long-term cost mRS 4                 | \$ 25 375,19 | Gamma | Lekander et al              |
| Long-term cost mRS 5                 | \$ 14 307,64 | Gamma | Lekander et al              |
| Spain                                |              |       |                             |
| Acute care cost MT+IVT mRS 0         | \$ 6 411,66  | Gamma | de Andrè Nogales et al. (6) |
| Acute care cost MT+IVT mRS 1         | \$ 7 124,06  | Gamma | de Andrè Nogales et al.     |
| Acute care cost MT+IVT mRS 2         | \$ 7 836,47  | Gamma | de Andrè Nogales et al.     |
| Acute care cost MT+IVT mRS 3         | \$ 4 010,17  | Gamma | de Andrè Nogales et al.     |
| Acute care cost MT+IVT mRS 4         | \$ 6 411,66  | Gamma | de Andrè Nogales et al.     |
| Acute care cost MT+IVT mRS 5         | \$ 7 124,06  | Gamma | de Andrè Nogales et al.     |
| Acute care cost MT+IVT mRS 6         | \$ 7 836,47  | Gamma | de Andrè Nogales et al.     |
| Acute care cost IVT mRS 0            | \$ 4 010,17  | Gamma | de Andrè Nogales et al.     |

|                                      |              |       |                         |
|--------------------------------------|--------------|-------|-------------------------|
| Acute care cost IVT mRS 1            | \$ 13 573,38 | Gamma | de Andrè Nogales et al. |
| Acute care cost IVT mRS 2            | \$ 14 093,01 | Gamma | de Andrè Nogales et al. |
| Acute care cost IVT mRS 3            | \$ 14 612,63 | Gamma | de Andrè Nogales et al. |
| Acute care cost IVT mRS 4            | \$ 15 308,43 | Gamma | de Andrè Nogales et al. |
| Acute care cost IVT mRS 5            | \$ 16 020,84 | Gamma | de Andrè Nogales et al. |
| Acute care cost IVT mRS 6            | \$ 16 733,25 | Gamma | de Andrè Nogales et al. |
| Acute care cost mRS 3 without MT+IVT | \$ 12 906,94 | Gamma | de Andrè Nogales et al. |
| Acute care cost mRS 4 without MT+IVT | \$ 6 372,28  | Gamma | de Andrè Nogales et al. |
| Acute care cost mRS 5 without MT+IVT | \$ 6 891,90  | Gamma | de Andrè Nogales et al. |
| Acute care cost mRS 6 without MT+IVT | \$ 7 411,53  | Gamma | de Andrè Nogales et al. |
| Acute care cost mRS 3 without IVT    | \$ 8 107,33  | Gamma | de Andrè Nogales et al. |
| Acute care cost mRS 4 without IVT    | \$ 8 819,74  | Gamma | de Andrè Nogales et al. |
| Acute care cost mRS 5 without IVT    | \$ 9 532,14  | Gamma | de Andrè Nogales et al. |
| Acute care cost mRS 6 without IVT    | \$ 5 705,84  | Gamma | de Andrè Nogales et al. |
| Mid-term cost mRS 0                  | \$ 685,67    | Gamma | de Andrè Nogales et al. |
| Mid-term cost mRS 1                  | \$ 761,86    | Gamma | de Andrè Nogales et al. |
| Mid-term cost mRS 2                  | \$ 838,04    | Gamma | de Andrè Nogales et al. |
| Mid-term cost mRS 3                  | \$ 8 192,57  | Gamma | de Andrè Nogales et al. |
| Mid-term cost mRS 4                  | \$ 13 217,41 | Gamma | de Andrè Nogales et al. |
| Mid-term cost mRS 5                  | \$ 16 701,68 | Gamma | de Andrè Nogales et al. |
| Long-term cost mRS 0                 | \$ 685,67    | Gamma | de Andrè Nogales et al. |
| Long-term cost mRS 1                 | \$ 761,86    | Gamma | de Andrè Nogales et al. |
| Long-term cost mRS 2                 | \$ 838,04    | Gamma | de Andrè Nogales et al. |

|                                      |              |       |                         |
|--------------------------------------|--------------|-------|-------------------------|
| Long-term cost mRS 3                 | \$ 8 192,57  | Gamma | de Andrè Nogales et al. |
| Long-term cost mRS 4                 | \$ 13 217,41 | Gamma | de Andrè Nogales et al. |
| Long-term cost mRS 5                 | \$ 16 701,68 | Gamma | de Andrè Nogales et al. |
| UK                                   |              |       |                         |
| Acute care cost MT+IVT mRS 0         | \$ 21 948,58 | Gamma | Lobotesis et al (7)     |
| Acute care cost MT+IVT mRS 1         | \$ 23 070,85 | Gamma | Lobotesis et al         |
| Acute care cost MT+IVT mRS 2         | \$ 24 193,13 | Gamma | Lobotesis et al         |
| Acute care cost MT+IVT mRS 3         | \$ 48 770,01 | Gamma | Lobotesis et al         |
| Acute care cost MT+IVT mRS 4         | \$ 60 480,12 | Gamma | Lobotesis et al         |
| Acute care cost MT+IVT mRS 5         | \$ 68 906,30 | Gamma | Lobotesis et al         |
| Acute care cost MT+IVT mRS 6         | \$ 22 318,62 | Gamma | Lobotesis et al         |
| Acute care cost IVT mRS 0            | \$ 9 012,58  | Gamma | Lobotesis et al         |
| Acute care cost IVT mRS 1            | \$ 10 134,85 | Gamma | Lobotesis et al         |
| Acute care cost IVT mRS 2            | \$ 11 257,13 | Gamma | Lobotesis et al         |
| Acute care cost IVT mRS 3            | \$ 35 834,01 | Gamma | Lobotesis et al         |
| Acute care cost IVT mRS 4            | \$ 47 544,12 | Gamma | Lobotesis et al         |
| Acute care cost IVT mRS 5            | \$ 55 970,30 | Gamma | Lobotesis et al         |
| Acute care cost IVT mRS 6            | \$ 9 382,62  | Gamma | Lobotesis et al         |
| Acute care cost mRS 3 without MT+IVT | \$ 33 181,01 | Gamma | Lobotesis et al         |
| Acute care cost mRS 4 without MT+IVT | \$ 44 891,12 | Gamma | Lobotesis et al         |
| Acute care cost mRS 5 without MT+IVT | \$ 53 317,30 | Gamma | Lobotesis et al         |
| Acute care cost mRS 6 without MT+IVT | \$ 6 729,62  | Gamma | Lobotesis et al         |
| Acute care cost mRS 3 without IVT    | \$ 33 181,01 | Gamma | Lobotesis et al         |
| Acute care cost mRS 4 without IVT    | \$ 44 891,12 | Gamma | Lobotesis et al         |
| Acute care cost mRS 5 without IVT    | \$ 53 317,30 | Gamma | Lobotesis et al         |
| Acute care cost mRS 6 without IVT    | \$ 6 729,62  | Gamma | Lobotesis et al         |
| Mid-term cost mRS 0                  | \$ 1 438,74  | Gamma | Lobotesis et al         |
| Mid-term cost mRS 1                  | \$ 1 692,52  | Gamma | Lobotesis et al         |
| Mid-term cost mRS 2                  | \$ 1 946,29  | Gamma | Lobotesis et al         |
| Mid-term cost mRS 3                  | \$ 6 924,25  | Gamma | Lobotesis et al         |
| Mid-term cost mRS 4                  | \$ 9 368,49  | Gamma | Lobotesis et al         |
| Mid-term cost mRS 5                  | \$ 15 212,93 | Gamma | Lobotesis et al         |
| Long-term cost mRS 0                 | \$ 1 438,74  | Gamma | Lobotesis et al         |
| Long-term cost mRS 1                 | \$ 1 692,52  | Gamma | Lobotesis et al         |
| Long-term cost mRS 2                 | \$ 1 946,29  | Gamma | Lobotesis et al         |
| Long-term cost mRS 3                 | \$ 6 924,25  | Gamma | Lobotesis et al         |
| Long-term cost mRS 4                 | \$ 9 368,49  | Gamma | Lobotesis et al         |
| Long-term cost mRS 5                 | \$ 15 212,93 | Gamma | Lobotesis et al         |
| The Netherlands                      |              |       |                         |
| Acute care cost MT+IVT mRS 0         | \$22 372     | Gamma | Baetean et al (8)       |
| Acute care cost MT+IVT mRS 1         | \$22 372     | Gamma | Baetean et al           |
| Acute care cost MT+IVT mRS 2         | \$24 932     | Gamma | Baetean et al           |

|                                      |          |       |               |
|--------------------------------------|----------|-------|---------------|
| Acute care cost MT+IVT mRS 3         | \$24 932 | Gamma | Baetean et al |
| Acute care cost MT+IVT mRS 4         | \$42 682 | Gamma | Baetean et al |
| Acute care cost MT+IVT mRS 5         | \$40 492 | Gamma | Baetean et al |
| Acute care cost MT+IVT mRS 6         | \$35 042 | Gamma | Baetean et al |
| Acute care cost IVT mRS 0            | \$8 711  | Gamma | Baetean et al |
| Acute care cost IVT mRS 1            | \$8 711  | Gamma | Baetean et al |
| Acute care cost IVT mRS 2            | \$11 271 | Gamma | Baetean et al |
| Acute care cost IVT mRS 3            | \$11 271 | Gamma | Baetean et al |
| Acute care cost IVT mRS 4            | \$29 021 | Gamma | Baetean et al |
| Acute care cost IVT mRS 5            | \$26 831 | Gamma | Baetean et al |
| Acute care cost IVT mRS 6            | \$21 381 | Gamma | Baetean et al |
| Acute care cost mRS 3 without MT+IVT | \$10 583 | Gamma | Baetean et al |
| Acute care cost mRS 4 without MT+IVT | \$28 333 | Gamma | Baetean et al |
| Acute care cost mRS 5 without MT+IVT | \$26 143 | Gamma | Baetean et al |
| Acute care cost mRS 6 without MT+IVT | \$20 693 | Gamma | Baetean et al |
| Acute care cost mRS 3 without IVT    | \$10 583 | Gamma | Baetean et al |
| Acute care cost mRS 4 without IVT    | \$28 333 | Gamma | Baetean et al |
| Acute care cost mRS 5 without IVT    | \$26 143 | Gamma | Baetean et al |
| Acute care cost mRS 6 without IVT    | \$20 693 | Gamma | Baetean et al |
| Mid-term cost mRS 0                  | \$3 280  | Gamma | Baetean et al |
| Mid-term cost mRS 1                  | \$3 280  | Gamma | Baetean et al |
| Mid-term cost mRS 2                  | \$5 545  | Gamma | Baetean et al |
| Mid-term cost mRS 3                  | \$5 545  | Gamma | Baetean et al |
| Mid-term cost mRS 4                  | \$21 975 | Gamma | Baetean et al |
| Mid-term cost mRS 5                  | \$19 511 | Gamma | Baetean et al |
| Long-term cost mRS 0                 | \$775    | Gamma | Baetean et al |
| Long-term cost mRS 1                 | \$775    | Gamma | Baetean et al |
| Long-term cost mRS 2                 | \$982    | Gamma | Baetean et al |
| Long-term cost mRS 3                 | \$982    | Gamma | Baetean et al |
| Long-term cost mRS 4                 | \$7 592  | Gamma | Baetean et al |
| Long-term cost mRS 5                 | \$9 711  | Gamma | Baetean et al |

Table 3. Utility values

| Parameter                 | Value  | Distribution | Source                  |
|---------------------------|--------|--------------|-------------------------|
| Post-stroke utility mRS 0 | 0,936  | Beta         | Rivero-Arias et al.[18] |
| Post-stroke utility mRS 1 | 0,817  | Beta         | Rivero-Arias et al.[18] |
| Post-stroke utility mRS 2 | 0,681  | Beta         | Rivero-Arias et al.[18] |
| Post-stroke utility mRS 3 | 0,558  | Beta         | Rivero-Arias et al.[18] |
| Post-stroke utility mRS 4 | 0,265  | Beta         | Rivero-Arias et al.[18] |
| Post-stroke utility mRS 5 | -0,054 | Beta         | Rivero-Arias et al.[18] |
| Post-stroke utility mRS 6 | 0      | Beta         | Rivero-Arias et al.[18] |



Figure S1. Health state transitions

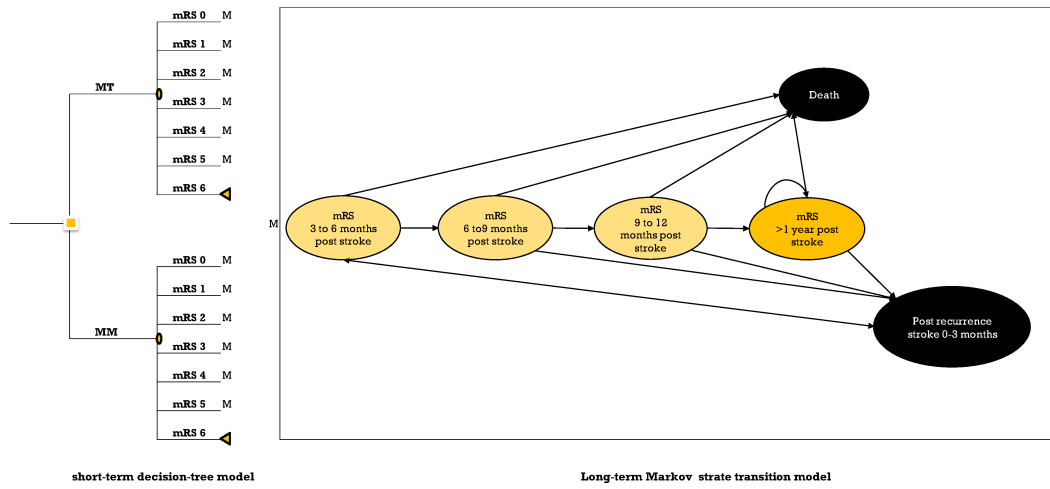

**Deterministic sensitivity analyses**

**Figure S2**

**Spain**

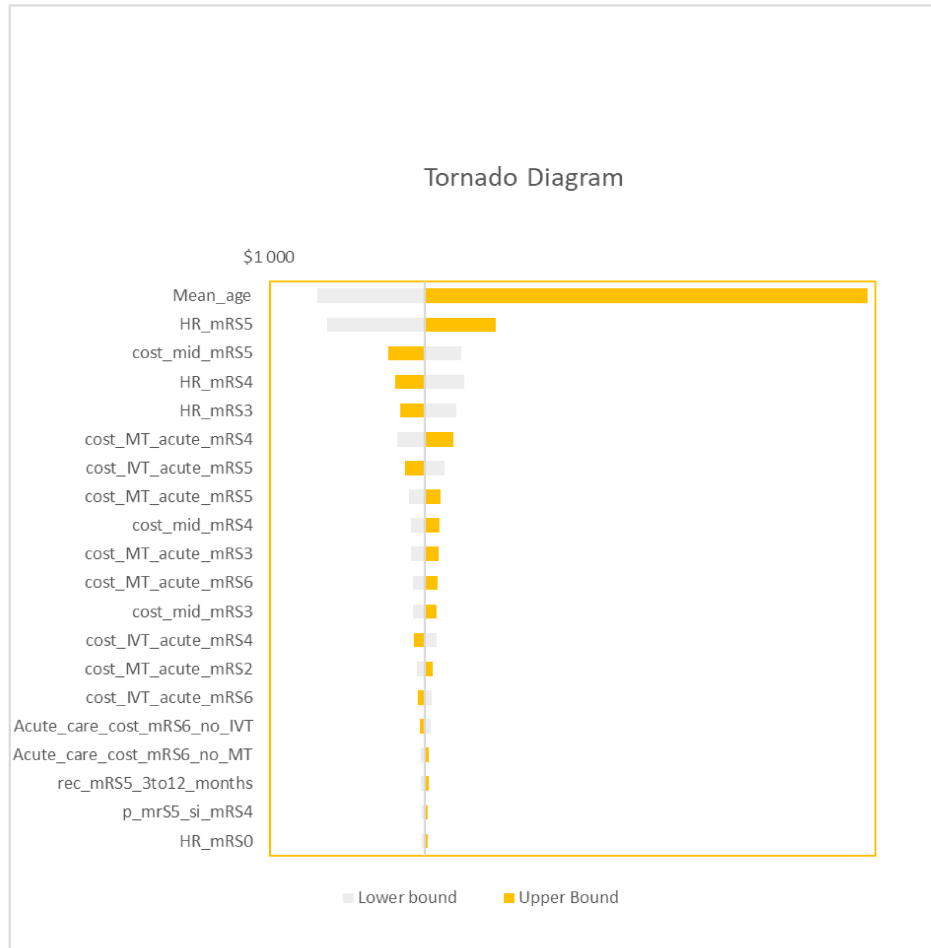

**Italy**

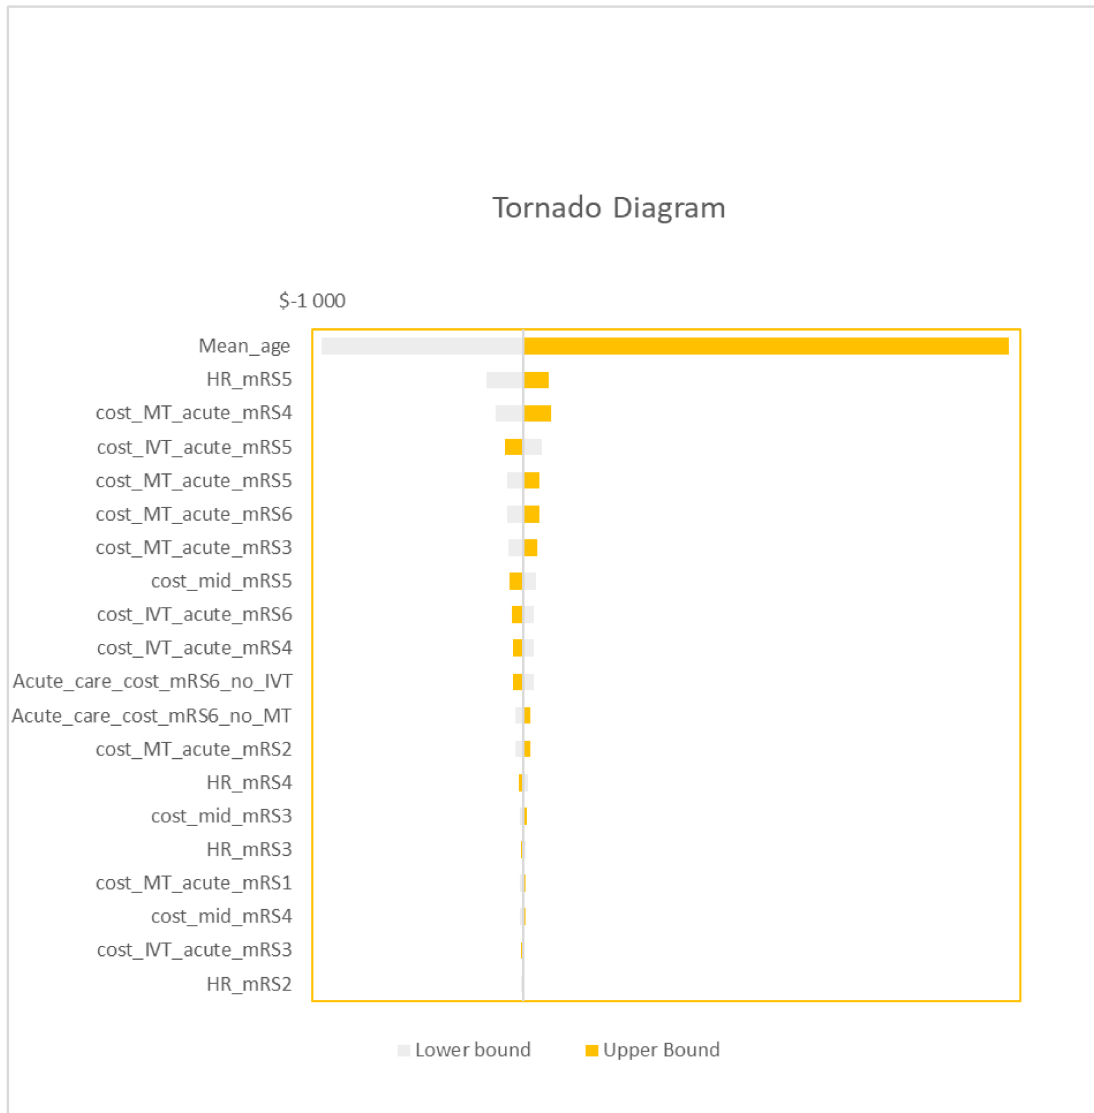

**The UK**

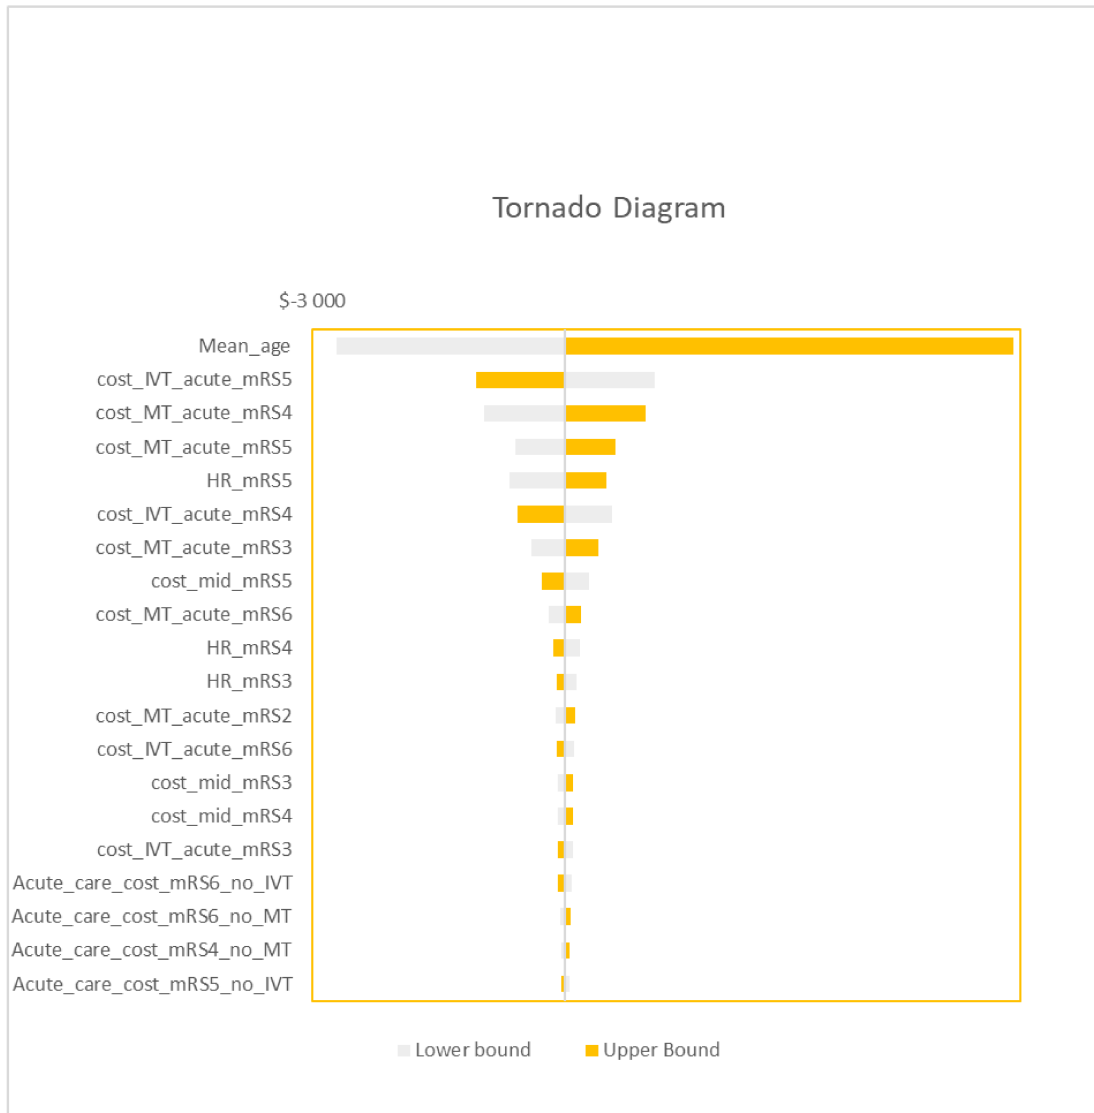

**France**

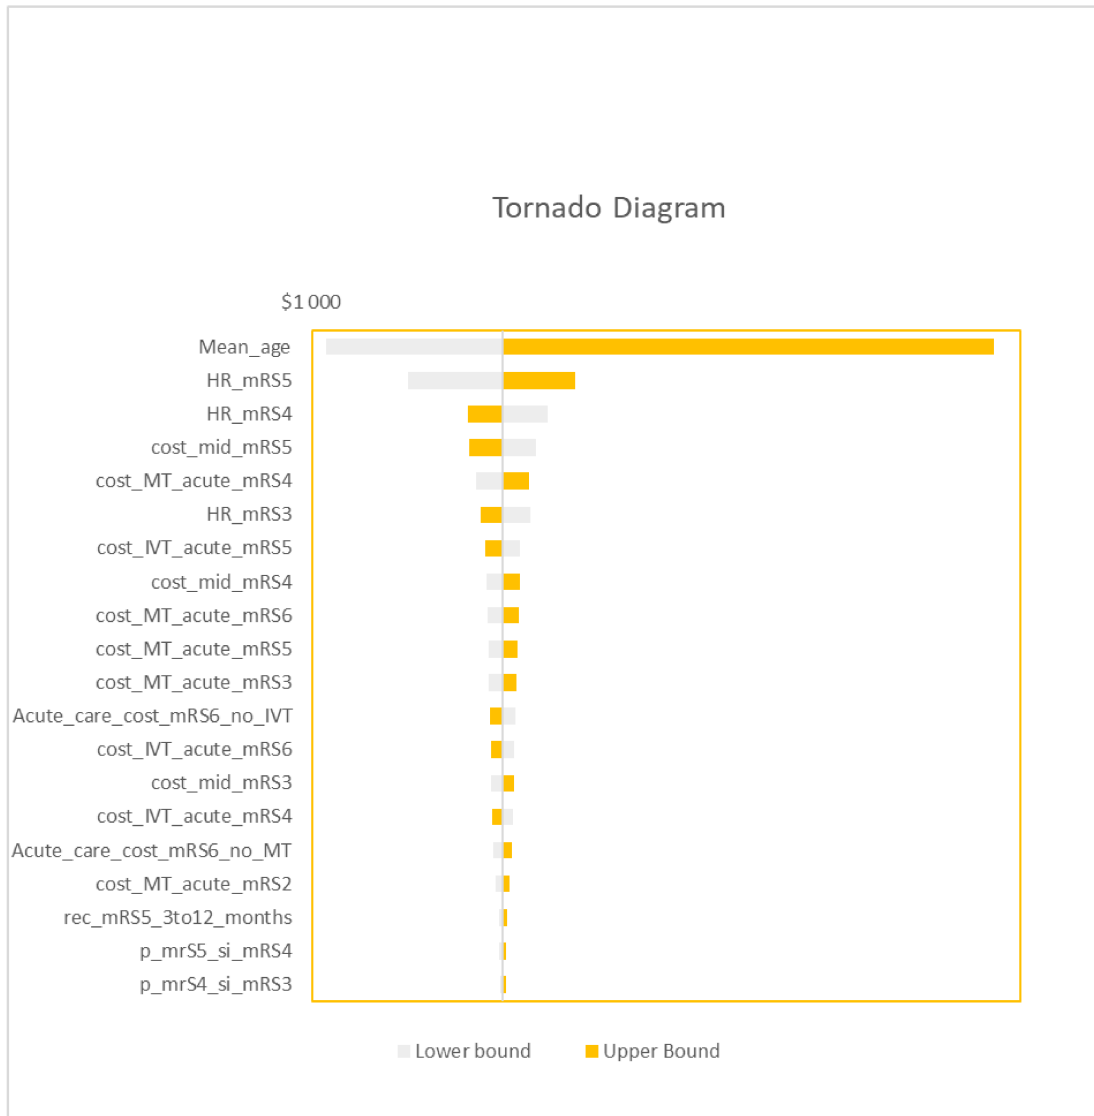

**Germany**

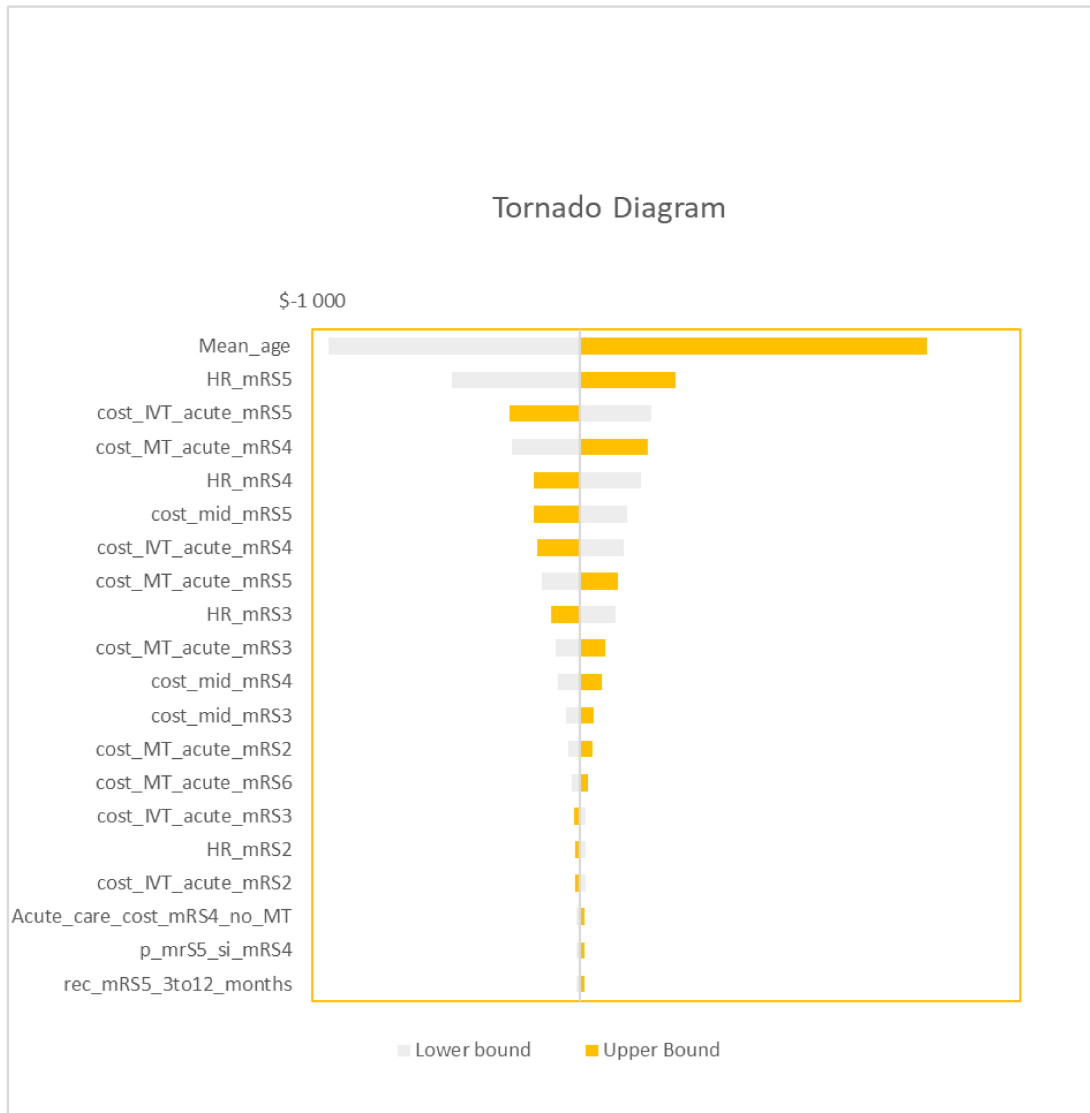

**Belgium**

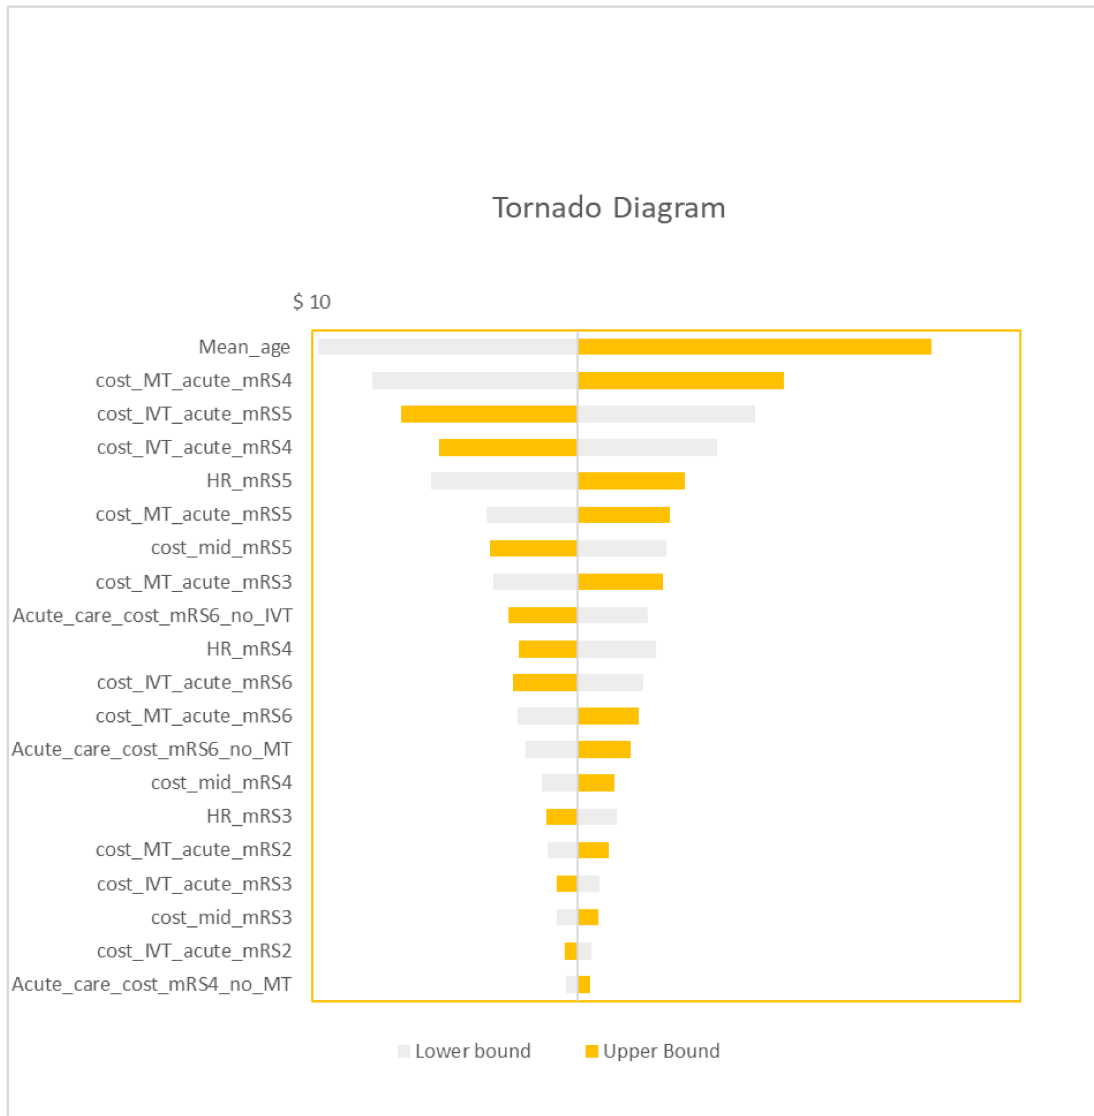

**The Netherlands**

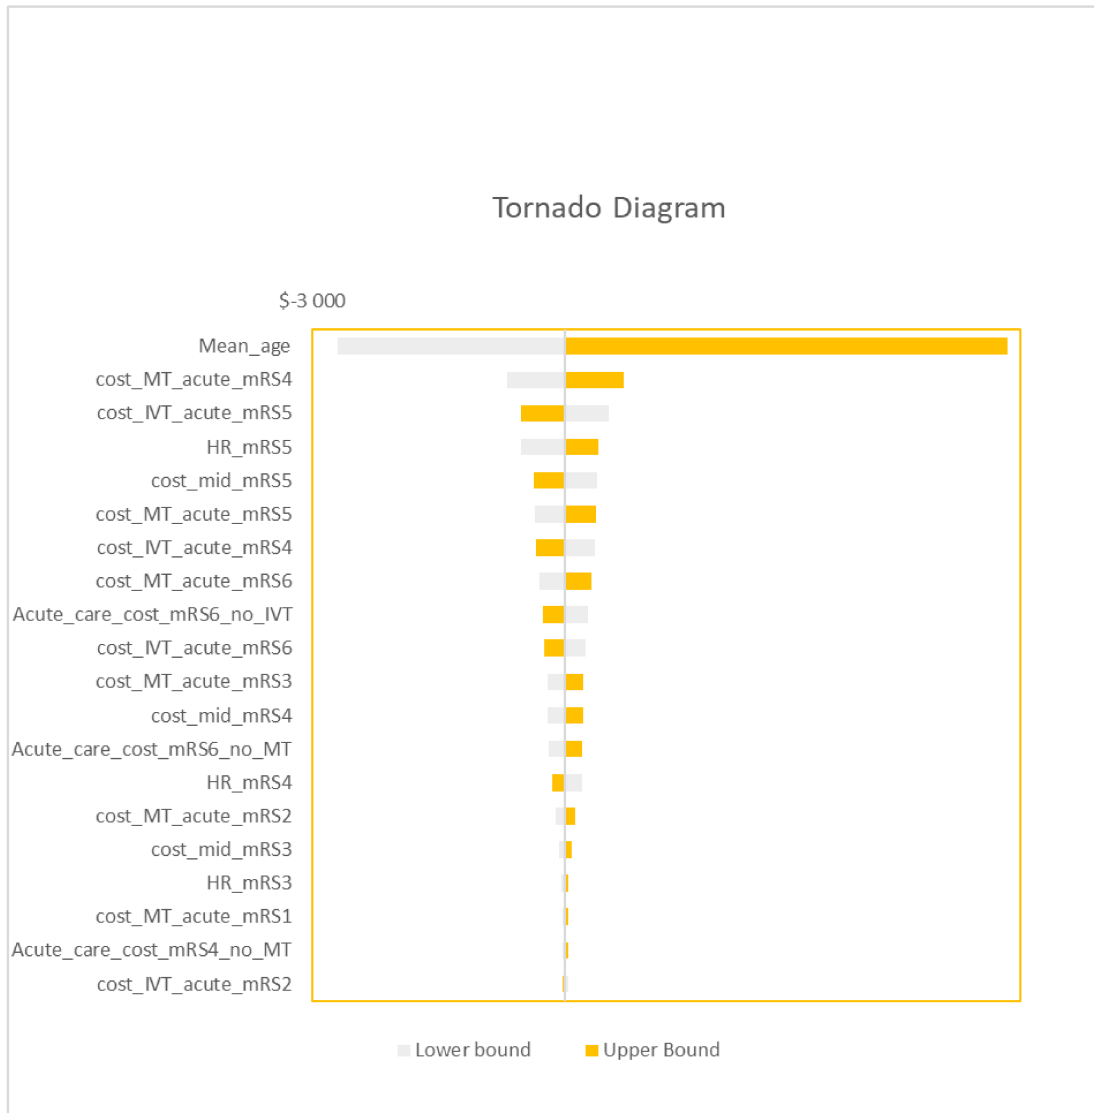

**Sweden**



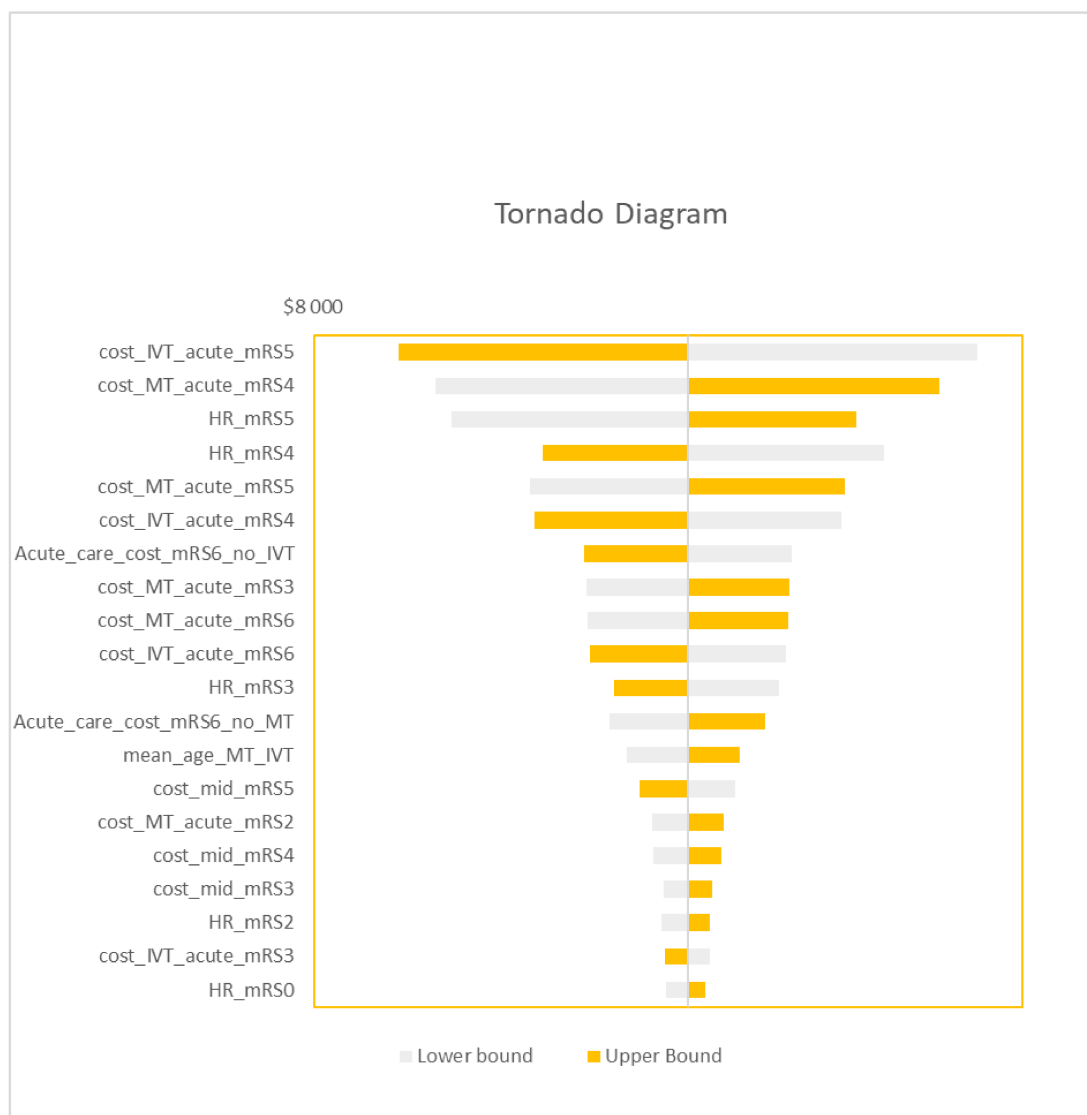

## Reference

1. Dewilde S, Annemans L, Peeters A, Hemelsoet D, Vandermeeren Y, Desfontaines P, et al. Modified Rankin scale as a determinant of direct medical costs after stroke. *Int J Stroke*. juin 2017;12(4):392-400.
2. Schmidt A, Heroum C, Caumette D, Le Lay K, Bénard S. Acute Ischemic Stroke (AIS) Patient Management in French Stroke Units and Impact Estimation of Thrombolysis on Care Pathways and Associated Costs. *Cerebrovasc Dis*. 2015;39(2):94-101.
3. Muntendorf LK, Konnopka A, König HH, Boutitie F, Ebinger M, Endres M, et al. Cost-Effectiveness of Magnetic Resonance Imaging-Guided Thrombolysis for Patients With Stroke With Unknown Time of Onset. *Value Health*. nov 2021;24(11):1620-7.

4. Fattore G, Torbica A, Susi A, Giovanni A, Benelli G, Gozzo M, et al. The social and economic burden of stroke survivors in Italy: a prospective, incidence-based, multi-centre cost of illness study. *BMC Neurol.* déc 2012;12(1):137.
5. Lekander I, Willers C, von Euler M, Lilja M, Sunnerhagen KS, Pessah-Rasmussen H, et al. Relationship between functional disability and costs one and two years post stroke. Boltze J, éditeur. *PLOS ONE.* 6 avr 2017;12(4):e0174861.
6. de Andrés-Nogales F, Álvarez M, de Miquel MÁ, Segura T, Gil A, Cardona P, et al. Cost-effectiveness of mechanical thrombectomy using stent retriever after intravenous tissue plasminogen activator compared with intravenous tissue plasminogen activator alone in the treatment of acute ischaemic stroke due to large vessel occlusion in Spain. *Eur Stroke J.* sept 2017;2(3):272-84.
7. Lobotesis K, Veltkamp R, Carpenter IH, Claxton LM, Saver JL, Hodgson R. Cost-effectiveness of stent-retriever thrombectomy in combination with IV t-PA compared with IV t-PA alone for acute ischemic stroke in the UK. *J Med Econ.* 2 août 2016;19(8):785-94.
8. Baeten SA, van Exel NJA, Dirks M, Koopmanschap MA, Dippel DW, Niessen LW. Lifetime health effects and medical costs of integrated stroke services - a non-randomized controlled cluster-trial based life table approach. *Cost Eff Resour Alloc.* déc 2010;8(1):21.
